# Supplementary material for: Cervical Dystonia as the Initial Symptom of IRF2BPL-related Disorder: A Case Report
Source: Research Square preprint supplement (doi:10.21203/rs.3.rs-7319210/v1), 2025-09-24
Supplement: Supplementary file 1 [file 54d76e0b4059f1802c4913d1.docx]

**Supplementary Table 1: Summary of Movement Symptoms and Treatment in IRF2BPL Mutation Syndrome Patients**

| **Author** | **Patient ID** | **Age at Onset** | **Initial Symptom(s)** | **Main Symptom(s) at Presentation** | **Type(s) of Movement Disorder** | **Treatment(s)** | | **Treatment Response (Motor Symptoms)** |
| --- | --- | --- | --- | --- | --- | --- | --- | --- |
| Lou et al[[1]](#endnote-1) | 1 | neonatal stage | epilepsy | epilepsy,Autism,dystonia | cervical dystonia,Difficulty chewing,Difficulty walking | Sodium Valproate,Levetiracetam,Clonazepam,Baclofen | | Improvement of dystonic symptoms |
| Alatrash et al[[2]](#endnote-2) | 2 | 10y | Developmental regression | Postural instability,Involuntary movements | Generalized Chorea, dysarthria, ataxia,Postural instability | Amitriptyline,Escitalopram | | / |
| Venkateswaran et al[[3]](#endnote-3) | 3 | 3y | Developmental delay | Frequent falls | Lower limb spasticity,hand dystonia,dysphagia,dysarthria, | / | | Died at the age of 10 due to respiratory and gastrointestinal failure |
| Kristiansen et al[[4]](#endnote-4) | 4 | 2y | Developmental delay | Developmental delay | hypotonia | Lorazepam,Clozapine | | Improvement of motor symptoms |
| Chen et al[[5]](#endnote-5) | 5 | 4y | ataxia,Generalized dystonia | Developmental regression | generalized dystonia,ataxia, | / | | / |
| Wang et al[[6]](#endnote-6) | 6 | 5m | Developmental regression | epilepsy | / | ACTH ,Acetazolamide | | / |
|  | 7 | neonatal stage | hypotonia | epilepsy | spasticity | Levetiracetam、Oxcarbazepine、Acetazolamide、Chlordiazepoxide、Clonazepam,Perampanel | | Disappearance of spasticity |
|  | 8 | neonatal stage | Developmental abnormality,epilepsy | Developmental regression | / | ACTH,Topiramate | | / |
| Horovitz et al[[7]](#endnote-7) | 9 | 6m | hypotonia | Developmental delay | hypotonia,dysarthria | / | | / |
|  | 10 | 20y | Gait abnormality | ataxia | ataxia,dysarthria,Bradykinesia | / | | / |
|  | 11 | 3y | hypotonia | Developmental delay | / | / | | / |
|  | 12 | 3y | Difficulty chewing | Gait abnormality | Gait abnormality,dysphagia,dysarthria, | / | | / |
| Gardella et al[[8]](#endnote-8) | 13 | 4y | Developmental delay | epilepsy | dysarthria,Difficulty walking,hypotonia, | Sodium Valproate、Clonazepam、Perampanel,Zonisamide | | Improvement of epileptic symptoms, no improvement in motor symptoms |
|  | 14 | 8y | epilepsy | epilepsy | Gait abnormality,hypotonia,ataxia,dystonia | Chlordiazepoxide、Brivaracetam,Perampanel | | Improvement of epileptic symptoms, no improvement in motor symptoms |
|  | 15 | 19y | epilepsy | epilepsy | ataxia,dysarthria | Sodium Valproate、Topiramate、Levetiracetam,Clonazepam | | Improvement of epileptic symptoms, no improvement in motor symptoms |
| Costa et al[[9]](#endnote-9) | 16 | 10y | epilepsy | Frequent falls | ataxia,Gait abnormality,Myoclonus,dysphagia | Multiple Antiepileptic Drugs | | No improvement in symptoms, passed away due to aspiration pneumonia caused by dysphagia |
|  | 17 | 15y | epilepsy,dysarthria | Postural tremor | ataxia,Myoclonus,dysphagia,Difficulty walking | Levetiracetam、Topiramate、Lamotrigine,Clonazepam | | Improvement in motor symptoms not reported |
| Yang et al[[10]](#endnote-10) | 18 | 8y | Developmental regression | dystoniadysarthria | hand dystonia,Difficulty walking,Frequent falls,dysarthria,Drooling | / | | / |
| Pisano et al[[11]](#endnote-11) | 19 | 7y | Developmental delay | epilepsy | Myoclonus,Action Tremor,ataxia | LevetiracetamClonazepam | | Improvement of epileptic symptoms, no motor symptoms reported |
| Qian et al[[12]](#endnote-12) | 20 | 4y | Gait abnormality | Developmental regression,epilepsy | | / | | / |
| Prilop et al[[13]](#endnote-13) | 21 | 6y | Gait abnormality | Gait abnormality,dysarthria | Gait abnormality,dysarthria,ataxia,Dystonia (Blepharospasm, Oromandibular, Upper Limb) | Levodopa、Benzhexol,Tetrahydrocannabinol | | |
| Antonelli et al[[14]](#endnote-14) | 22-24 | from the third to the fifth decade | | ataxia、dystonia,dysarthria | / | / | | / |
| Ganos et al[[15]](#endnote-15) | 25 | 23y | Gait abnormality | Generalized dystonia | Generalized Dystonia (Oromandibular, Limbs),dysarthria | / | | / |
|  | 26 | 2y | Developmental delay | Generalizeddystonia | Generalized Dystonia (Lower Limbs, Oromandibular) | / | | / |
| Spagnoli et al[[16]](#endnote-16) | 27 | neonatal stage | epilepsy | epilepsy | dysphagia,hypotonia | Lamotrigine、Carbamazepine、Oxcarbazepine、Topiramate、Clonazepam | | Improvement of epileptic symptoms, no motor symptoms reported |
| Ginevrino et al[[17]](#endnote-17) | 28 | 30m | Developmental delay | dystonia | Limb Dystonia, Chorea, dysarthria, Drooling | / | | / |
| Skorvanek et al[[18]](#endnote-18) | 29 | 3y | Developmental delay | epilepsy | dysarthria,ataxia,generalized dystonia, Frequent falls | / | | / |
| Shelkowitz et al[[19]](#endnote-19) | 30 | neonatal stage | hypotonia | epilepsy |  | Multiple Antiepileptic Drugs | | No therapeutic effect |
| Marcogliese et al[[20]](#endnote-20) | 31 | 30m | epilepsy | Developmental delay | dysphagia,ataxia,Chorea athetosis,dystonia, | / | | / |
|  | 32 | 5y | epilepsy | Developmental delay | dystonia,dysphagia,dysarthria, | / | | / |
|  | 33 | 6y | ataxia | Spasticity | ataxia,dysarthria,dysphagia | / | | / |
|  | 34 |  | Lower limb dystonia,dysphagia | epilepsy | / | / | | / |
|  | 35 | 5y | Developmental delay | epilepsy | ataxia,Chorea athetosis,generalized dystonia,Difficulty walking | / | | / |
|  | 36 | 14m | epilepsy | epilepsy | / | / | | / |
|  | 37 | 6m | epilepsy | epilepsy | / | / | | / |
| Mau-Them et al[[21]](#endnote-21) | 38 | 30m | Developmental delay | dystonia | dystonia,Chorea athetosis, | Topiramate,Clonazepam | | / |
|  | 39 | 5y | Developmental delay | / | / | Lamotrigine,Levetiracetam,Clonazepam,Sodium Valproate | | / |
|  | 40 | 7m | epilepsy | epilepsy | dysarthria,ataxia,dystonia, | Sodium Valproate,Lamotrigine, | | / |
|  | 41 | 26y | epilepsy | epilepsy | ataxia | Levetiracetam,Clonazepam | | / |
|  | 42 | 30y | Developmental delay | | ataxia,dysphagia | Amantadine、 Levodopa、Carbidopa | | / |
|  | 43 | 7y | Developmental delay | | dystonia,ataxia,dysarthria,dysphagia | Baclofen Pump | | / |
|  | 44 | 1m | Developmental delay | epilepsy | ataxia,hypotonia | Sodium Valproate,Topiramate,Carbamazepine,Clonazepam | | / |
|  | 45 | 3y | Developmental delay | | dystonia,ataxia,dysarthria,dysphagia, | | | / |
|  | 46 | 1y | Developmental delay | Autism | / | / | | / |
|  | 47 | 23m | dysphagia | | dysphagia | | | / |
|  | 48 | 6m | Developmental delay | | Spasticity | Levetiracetam,Sodium Valproate,Topiramate,Lamotrigine | | / |
| Heide et al[[22]](#endnote-22) | 49-65 |  |  |  | Two patients reported dystonia, with details unspecified; eight patients reported ataxia, seven reported dysarthria, and seven reported unsteady gait | | | / |
| our patient | 66 | 14y | dystonia | epilepsy | dysarthria, ataxia, dystonia,Frequent falls | | botulinum, carbamazepine | complete resolution of the dystonia symptoms |
| /:Relevant information not reported in the case | | | | | |  | |  |

1 Lou, X. *et al.* Clinical characterization of IRF2BPL mutation: Case series and review of the literature. *Medicine (Baltimore)* **104**, e41078 (2025). <https://doi.org:10.1097/md.0000000000041078>

2 Alatrash, S., Street, D., O'Driscoll, M. & Samra, A. D. Late-Onset Ataxia, Chorea, Cognitive Impairment, and Insomnia: Expanding the Phenotype of IRF2BPL-Related Disease. *J Mov Disord* **18**, 274-276 (2025). <https://doi.org:10.14802/jmd.25030>

3 Venkateswaran, S. *et al.* IRF2BPL-Related Disorder, Causing Neurodevelopmental Disorder with Regression, Abnormal Movements, Loss of Speech and Seizures (NEDAMSS) Is Characterized by Pathology Consistent with DRPLA. *Mov Disord* **39**, 2102-2109 (2024). <https://doi.org:10.1002/mds.29938>

4 Kristiansen, K., Vernal, D. L. & Hulgaard, D. R. Expanding the phenotype of NEDAMSS with a psychiatric perspective: analysis of a new case, and a systematic review of the literature. *Eur Child Adolesc Psychiatry* **34**, 835-852 (2025). <https://doi.org:10.1007/s00787-024-02522-7>

5 Chen, P. S. *et al.* Genetic analysis of IRF2BPL in a Taiwanese dystonia cohort: The genotype and phenotype correlation. *Ann Clin Transl Neurol* **11**, 1557-1566 (2024). <https://doi.org:10.1002/acn3.52072>

6 Wang, Y. *et al.* De novo variants of IRF2BPL result in developmental epileptic disorder. *Orphanet J Rare Dis* **19**, 121 (2024). <https://doi.org:10.1186/s13023-024-03130-z>

7 Horovitz, D. D. G., de Faria Domingues de Lima, M. A., Pires, L. C., Campos Araujo, A. Q. & Vargas, F. R. Neurological Phenotypes of IRF2BPL Gene Variants: A Report of Four Novel Variants. *J Cent Nerv Syst Dis* **15**, 11795735231181467 (2023). <https://doi.org:10.1177/11795735231181467>

8 Gardella, E. *et al.* IRF2BPL as a novel causative gene for progressive myoclonus epilepsy. *Epilepsia* **64**, e170-e176 (2023). <https://doi.org:10.1111/epi.17634>

9 Costa, C. *et al.* IRF2BPL: A new genotype for progressive myoclonus epilepsies. *Epilepsia* **64**, e164-e169 (2023). <https://doi.org:10.1111/epi.17557>

10 Yang, F., Li, H., Dai, Y., Zhang, R. & Zhang, J. T. IRF2BPL gene variants with dystonia: one new Chinese case report. *BMC Neurol* **23**, 32 (2023). <https://doi.org:10.1186/s12883-023-03077-x>

11 Pisano, S. *et al.* Neurological phenomenology of the IRF2BPL mutation syndrome: Analysis of a new case and systematic review of the literature. *Seizure* **99**, 12-15 (2022). <https://doi.org:10.1016/j.seizure.2022.04.010>

12 Qian, X. H. *et al.* Neurodevelopmental disorder caused by a truncating de novo variant of IRF2BPL. *Seizure* **84**, 47-52 (2021). <https://doi.org:10.1016/j.seizure.2020.11.006>

13 Prilop, L. *et al.* IRF2BPL mutation causes nigrostriatal degeneration presenting with dystonia, spasticity and keratoconus. *Parkinsonism Relat Disord* **79**, 141-143 (2020). <https://doi.org:10.1016/j.parkreldis.2020.03.030>

14 Antonelli, F., Grieco, G., Cavallieri, F., Casella, A. & Valente, E. M. Adult onset familiar dystonia-plus syndrome: A novel presentation of IRF2BPL-associated neurodegeneration. *Parkinsonism Relat Disord* **94**, 22-24 (2022). <https://doi.org:10.1016/j.parkreldis.2021.10.033>

15 Ganos, C. *et al.* IRF2BPL mutations cause autosomal dominant dystonia with anarthria, slow saccades and seizures. *Parkinsonism Relat Disord* **68**, 57-59 (2019). <https://doi.org:10.1016/j.parkreldis.2019.09.020>

16 Spagnoli, C., Rizzi, S., Salerno, G. G., Frattini, D. & Fusco, C. IRF2BPL gene variants: One new case. *Am J Med Genet A* **182**, 255-256 (2020). <https://doi.org:10.1002/ajmg.a.61401>

17 Ginevrino, M. *et al.* A novel IRF2BPL truncating variant is associated with endolysosomal storage. *Mol Biol Rep* **47**, 711-714 (2020). <https://doi.org:10.1007/s11033-019-05109-7>

18 Skorvanek, M. *et al.* Neurodevelopmental disorder associated with IRF2BPL gene mutation: Expanding the phenotype? *Parkinsonism Relat Disord* **62**, 239-241 (2019). <https://doi.org:10.1016/j.parkreldis.2019.01.017>

19 Shelkowitz, E., Singh, J. K., Larson, A. & Elias, E. R. IRF2BPL gene mutation: Expanding on neurologic phenotypes. *Am J Med Genet A* **179**, 2263-2271 (2019). <https://doi.org:10.1002/ajmg.a.61328>

20 Marcogliese, P. C. *et al.* IRF2BPL Is Associated with Neurological Phenotypes. *Am J Hum Genet* **103**, 245-260 (2018). <https://doi.org:10.1016/j.ajhg.2018.07.006>

21 Tran Mau-Them, F. *et al.* De novo truncating variants in the intronless IRF2BPL are responsible for developmental epileptic encephalopathy. *Genet Med* **21**, 1008-1014 (2019). <https://doi.org:10.1038/s41436-018-0143-0>

22 Heide, S. *et al.* IRF2BPL Causes Mild Intellectual Disability Followed by Late-Onset Ataxia. *Neurol Genet* **9**, e200096 (2023). <https://doi.org:10.1212/nxg.0000000000200096>

1. 1 Lou, X. *et al.* Clinical characterization of IRF2BPL mutation: Case series and review of the literature. *Medicine (Baltimore)* **104**, e41078 (2025). https://doi.org:10.1097/md.0000000000041078 [↑](#endnote-ref-1)
2. 2 Alatrash, S., Street, D., O'Driscoll, M. & Samra, A. D. Late-Onset Ataxia, Chorea, Cognitive Impairment, and Insomnia: Expanding the Phenotype of IRF2BPL-Related Disease. *J Mov Disord* **18**, 274-276 (2025). https://doi.org:10.14802/jmd.25030 [↑](#endnote-ref-2)
3. 3 Venkateswaran, S. *et al.* IRF2BPL-Related Disorder, Causing Neurodevelopmental Disorder with Regression, Abnormal Movements, Loss of Speech and Seizures (NEDAMSS) Is Characterized by Pathology Consistent with DRPLA. *Mov Disord* **39**, 2102-2109 (2024). https://doi.org:10.1002/mds.29938 [↑](#endnote-ref-3)
4. 4 Kristiansen, K., Vernal, D. L. & Hulgaard, D. R. Expanding the phenotype of NEDAMSS with a psychiatric perspective: analysis of a new case, and a systematic review of the literature. *Eur Child Adolesc Psychiatry* **34**, 835-852 (2025). https://doi.org:10.1007/s00787-024-02522-7 [↑](#endnote-ref-4)
5. 5 Chen, P. S. *et al.* Genetic analysis of IRF2BPL in a Taiwanese dystonia cohort: The genotype and phenotype correlation. *Ann Clin Transl Neurol* **11**, 1557-1566 (2024). https://doi.org:10.1002/acn3.52072 [↑](#endnote-ref-5)
6. 6 Wang, Y. *et al.* De novo variants of IRF2BPL result in developmental epileptic disorder. *Orphanet J Rare Dis* **19**, 121 (2024). https://doi.org:10.1186/s13023-024-03130-z [↑](#endnote-ref-6)
7. 7 Horovitz, D. D. G., de Faria Domingues de Lima, M. A., Pires, L. C., Campos Araujo, A. Q. & Vargas, F. R. Neurological Phenotypes of IRF2BPL Gene Variants: A Report of Four Novel Variants. *J Cent Nerv Syst Dis* **15**, 11795735231181467 (2023). https://doi.org:10.1177/11795735231181467 [↑](#endnote-ref-7)
8. 8 Gardella, E. *et al.* IRF2BPL as a novel causative gene for progressive myoclonus epilepsy. *Epilepsia* **64**, e170-e176 (2023). https://doi.org:10.1111/epi.17634 [↑](#endnote-ref-8)
9. 9 Costa, C. *et al.* IRF2BPL: A new genotype for progressive myoclonus epilepsies. Ibid., e164-e169 https://doi.org:10.1111/epi.17557 [↑](#endnote-ref-9)
10. 10 Yang, F., Li, H., Dai, Y., Zhang, R. & Zhang, J. T. IRF2BPL gene variants with dystonia: one new Chinese case report. *BMC Neurol* **23**, 32 (2023). https://doi.org:10.1186/s12883-023-03077-x [↑](#endnote-ref-10)
11. 11 Pisano, S. *et al.* Neurological phenomenology of the IRF2BPL mutation syndrome: Analysis of a new case and systematic review of the literature. *Seizure* **99**, 12-15 (2022). https://doi.org:10.1016/j.seizure.2022.04.010 [↑](#endnote-ref-11)
12. 12 Qian, X. H. *et al.* Neurodevelopmental disorder caused by a truncating de novo variant of IRF2BPL. Ibid. **84**, 47-52 (2021). https://doi.org:10.1016/j.seizure.2020.11.006 [↑](#endnote-ref-12)
13. 13 Prilop, L. *et al.* IRF2BPL mutation causes nigrostriatal degeneration presenting with dystonia, spasticity and keratoconus. *Parkinsonism Relat Disord* **79**, 141-143 (2020). https://doi.org:10.1016/j.parkreldis.2020.03.030 [↑](#endnote-ref-13)
14. 14 Antonelli, F., Grieco, G., Cavallieri, F., Casella, A. & Valente, E. M. Adult onset familiar dystonia-plus syndrome: A novel presentation of IRF2BPL-associated neurodegeneration. Ibid. **94**, 22-24 (2022). https://doi.org:10.1016/j.parkreldis.2021.10.033 [↑](#endnote-ref-14)
15. 15 Ganos, C. *et al.* IRF2BPL mutations cause autosomal dominant dystonia with anarthria, slow saccades and seizures. Ibid. **68**, 57-59 (2019). https://doi.org:10.1016/j.parkreldis.2019.09.020 [↑](#endnote-ref-15)
16. 16 Spagnoli, C., Rizzi, S., Salerno, G. G., Frattini, D. & Fusco, C. IRF2BPL gene variants: One new case. *Am J Med Genet A* **182**, 255-256 (2020). https://doi.org:10.1002/ajmg.a.61401 [↑](#endnote-ref-16)
17. 17 Ginevrino, M. *et al.* A novel IRF2BPL truncating variant is associated with endolysosomal storage. *Mol Biol Rep* **47**, 711-714 (2020). https://doi.org:10.1007/s11033-019-05109-7 [↑](#endnote-ref-17)
18. 18 Skorvanek, M. *et al.* Neurodevelopmental disorder associated with IRF2BPL gene mutation: Expanding the phenotype? *Parkinsonism Relat Disord* **62**, 239-241 (2019). https://doi.org:10.1016/j.parkreldis.2019.01.017 [↑](#endnote-ref-18)
19. 19 Shelkowitz, E., Singh, J. K., Larson, A. & Elias, E. R. IRF2BPL gene mutation: Expanding on neurologic phenotypes. *Am J Med Genet A* **179**, 2263-2271 (2019). https://doi.org:10.1002/ajmg.a.61328 [↑](#endnote-ref-19)
20. 20 Marcogliese, P. C. *et al.* IRF2BPL Is Associated with Neurological Phenotypes. *Am J Hum Genet* **103**, 245-260 (2018). https://doi.org:10.1016/j.ajhg.2018.07.006 [↑](#endnote-ref-20)
21. 21 Tran Mau-Them, F. *et al.* De novo truncating variants in the intronless IRF2BPL are responsible for developmental epileptic encephalopathy. *Genet Med* **21**, 1008-1014 (2019). https://doi.org:10.1038/s41436-018-0143-0 [↑](#endnote-ref-21)
22. 22 Heide, S. *et al.* IRF2BPL Causes Mild Intellectual Disability Followed by Late-Onset Ataxia. *Neurol Genet* **9**, e200096 (2023). https://doi.org:10.1212/nxg.0000000000200096 [↑](#endnote-ref-22)
